# Supplementary material for: A Systematic Review of Culturally Competent Family Violence Responses to Women in Primary Care
Source: PubMed Central journal article supplement — Trauma Violence Abuse. 2021 Oct 10;24(2):928–45. doi: 10.1177/15248380211046968 (PMC10009494; doi:10.1177/15248380211046968), 2021-10-10
Supplement: sj-pdf-1-tva-10.1177_15248380211046968.pdf [file sj-pdf-1-tva-10.1177_15248380211046968.pdf]

## Search Strategy

### Ovid Medline

1. exp Battered Women/
2. exp Domestic Violence/
3. exp Spouse Abuse/
4. (abus\$ adj3 wom#n).tw.
5. (abus\$ adj3 spous\$).tw.
6. (abus\$ adj3 partner\$).tw.
7. (abus\$ adj3 (wife or wives)).tw.
8. (batter\$ adj3 (wife or wives)).tw.
9. (batter\$ adj3 wom#n).tw.
10. domestic violence.tw.
11. (partner\$ adj3 violen\$).tw.
12. (spous\$ adj3 violen\$).tw.
13. (gender\$ adj3 violen\$).tw.
14. exp family violence/
15. marital rape.mp. or exp marital rape/
16. or/1-15
17. (cultur\$ adj3 (competen\$ or safe\$ or intelligen\$ or aware\$ or care or respon\$ or sensitiv\$)).tw.
18. 16 and 17

### Embase (Ovid)

1. exp partner violence/

2. exp domestic violence/

3. marital rape/

4. (abus\$ adj3 wom#n).tw.

5. (abus\$ adj3 partner\$).tw.

6. (abus\$ adj3 spous\$).tw.

7. exp family violence/

8. (abus\$ adj3 (wife or wives)).tw.

9. (batter\$ adj3 (wife or wives)).tw.

10. (batter\$ adj3 wom#n).tw.

11. (partner\$ adj violen\$).tw.

12. (spous\$ adj3 violen\$).tw.

13. (gender\$ adj3 violen\$).tw.

14. (beat\$ adj3 (wife or wives)).tw.

15. domestic violence.tw.

16. (cultur\$ adj3 competen\$).tw.

17. (cultur\$ adj3 safe\$).tw.

18. (cultur\$ adj3 intelligen\$).tw.

19. (cultur\$ adj3 sensitiv\$).tw.

20. (cultur\$ adj3 aware\$).tw.

21. (cultur\$ adj3 care).tw.

22. (cultur\$ adj3 respon\$).tw.

23. exp cultural safety/

24. or/1-15

25. or/16-23

26. 24 and 25

**Ovid PsycInfo**

1. exp Intimate Partner Violence/

2. exp Domestic Violence/

3. family violence.mp.

4. (abus\$ adj3 wom#n).tw.

5. (abus\$ adj3 spous\$).tw.

6. (abus\$ adj3 partner\$).tw.

7. (violen\$ adj3 partner\$).tw.

8. ((batter\$ or beat\$) adj3 (wife or wives)).tw.

9. (batter\$ adj3 wom#n).tw.

10. (violen\$ adj3 spous\$).tw.

11. (gender\$ adj3 violen\$).tw.

12. family violence.tw.

13. partner violence.tw.

14. domestic violence.tw.

15. or/1-14

16. cultur\$ competen\$.tw.

17. cultur\$ aware\$.tw.

18. cultur\$ sensitiv\$.tw.

19. cultur\$ intelligen\$.tw.

20. cultur\$ safe\$.tw.

21. (cultur\$ adj3 (intelligen\$ or aware\$ or safe\$ or competen\$)).tw.

22. (cultur\$ adj3 (care or respon\$)).tw.

23. or/16-22

24. 15 and 23

### **CINAHL (EBSCO)**

S1 "Domestic Violence"

S2 "partner violence"

S3 "battered women"

S4 "family violence"

S5 TI (abus\* or violen\* or batter\* or beat\*) N3 (wom?n or partner\* or spous\* or wife or wives)

S6 AB (abus\* or violen\* or batter\* or beat\*) N3 (wom?n or partner\* or spous\* or wife or wives)

S7 AB gender N3 violen\*

S8 TI gender\* N3 violen\*

S9 S5 OR S6

S10 S7 OR S8

S11 S1 OR S2 OR S3 OR S4 OR S9 OR S10

S12 TI (cultur\* AND (competen\* or safe\* or aware\* or intelligen\* or sensitiv\*)) OR AB (cultur\* AND (competen\* or safe\* or aware\* or intelligen\* or sensitiv\*))

S13 TI (cultur\* n3 (care or respon\*)) OR AB (cultur\* n3 (care or respon\*))

S14 S12 OR S13

S15 (S12 OR S13) AND (S11 AND S14)

**Scopus**

(( TITLE-ABS-KEY ("domestic violence" )) OR ( TITLE-ABS-KEY ("intimate partner violence" )) OR ( TITLE-ABS-KEY ("family violence" )) OR ( TITLE-ABS-KEY ( abus\* W/3 partner\* )) OR ( TITLE-ABS-KEY ( abus\* W/3 wom?n\* )) OR ( TITLE-ABS-KEY ( abus\* W/3 ( wife OR wives ) )) OR ( TITLE-ABS-KEY ( abus\* W/3 spous\* )) OR ( TITLE-ABS-KEY ( abus\* W/3 marital )) OR ( TITLE-ABS-KEY ( ( batter\* OR beat\* ) W/3 ( wife OR wives OR partner\* OR spous\* ) )) OR ( TITLE-ABS-KEY ( ( violen\* ) W/3 ( wife OR wives OR partner\* OR spous\* ) )) OR ( TITLE-ABS-KEY ( violen\* W/3 gender\* )) ) AND ( ( TITLE-ABS-KEY ("cultur\* competen\*" ) ) OR ( TITLE-ABS-KEY ("cultur\* aware\*" ) ) OR ( TITLE-ABS-KEY ("cultur\* intelligen\*" ) ) OR ( TITLE-ABS-KEY ("cultur\* sensitiv\*" ) ) OR ( TITLE-ABS-KEY ( cultur\* W/3 ( competen\* OR aware\* OR intelligen\* OR sensitiv\* ) ) ) OR ( TITLE-ABS-KEY ( cultur\* W/3 ( care OR respon\* ) ) ) ) )

**Web of Science**

1. TS=(domestic violence)
2. TS=(intimate partner violence)
3. TS=(family violence)
4. TS=(abus\* NEAR/3 spous\*)
5. TS=(abus\* NEAR/3 (wife or wives))
6. TS=(abus\* NEAR/3 partner)
7. TS=(abus\* NEAR/3 marital)
8. TS=(batter\* NEAR/3 (spous\* or wife or wives or partner))
9. TS=(beat\* NEAR/3 (wife or wives or partner\*))
10. TS=(violen\* NEAR/3 (spous\* or wife or wives or partner\*))

11. TS=(abus\* NEAR/3 wom\*n)
12. TS=(gender\* NEAR/3 violen\*)
13. TS=(rape NEAR/3 (marital or wife or wives or partner\*))
14. #13 OR #12 OR #11 OR #10 OR #9 OR #8 OR #7 OR #6 OR #5 OR #4 OR #3 OR #2  
OR #1
15. TS=(cultur\* competen\*)
16. TS=(cultur\* aware\*)
17. TS=(cultur\* intelligen\*)
18. TS=(cultur\* sensitiv\*)
19. TS=(cultur\* NEAR/3 (competen\* or aware\* or sensitiv\* or intelligen\*))
20. TS=(cultur\* NEAR/3 (care or respon\*))
21. #20 OR #19 OR #18 OR #17 OR #16 OR #15
22. #21 AND #14

### **Sociological Abstract**

(noft(Domestic Violence) OR (mainsubject("domestic violence") OR mainsubject("intimate partner violence") OR mainsubject("family violence"))) OR noft(partner\* NEAR/3 abus\*) OR noft(wom\*n NEAR/3 abus\*) OR noft(batter\* NEAR/3 (wife OR wives)) OR noft(beat\* NEAR/3 (wife OR wives OR partner\*)) OR noft(violen\* NEAR/3 (wife OR wives OR partner OR wom\*n)) OR noft(gender NEAR/3 violen\*) OR noft(spous\* NEAR/3 (batter\* OR beat OR violen\* OR abus\*)) AND (noft("cultur\* competen\*") OR noft("cultur\* sensitiv\*") OR noft("cultur\* aware\*") OR noft("cultur\* safe\*") OR noft("cultur\* intelligen\*") OR noft(cultur\* NEAR/3 (competen\* OR aware\* OR sensitiv\* OR intelligen\*)) OR noft(cultur\* NEAR/3 (care OR respon\*)))

**Dissertation and Theses Global**

(noft(Domestic Violence) OR (mainsubject("domestic violence") OR mainsubject("intimate partner violence") OR mainsubject("family violence"))) OR noft(partner\* NEAR/3 abus\*) OR noft(wom\*n NEAR/3 abus\*) OR noft(batter\* NEAR/3 (wife OR wives)) OR noft(beat\* NEAR/3 (wife OR wives OR partner\*)) OR noft(violen\* NEAR/3 (wife OR wives OR partner OR wom\*n)) OR noft(gender NEAR/3 violen\*) OR noft(spous\* NEAR/3 (batter\* OR beat OR violen\* OR abus\*)) AND (noft("cultur\* competen\*") OR noft("cultur\* sensitiv\*") OR noft("cultur\* aware\*") OR noft("cultur\* safe\*") OR noft("cultur\* intelligen\*") OR noft(cultur\* NEAR/3 (competen\* OR aware\* OR sensitiv\* OR intelligen\*)) OR noft(cultur\* NEAR/3 (care OR respon\*)))

**Names of Organizations for Grey Literature Search**

1. Australian Institute of Health and Welfare
2. Centre for Culture, Ethnicity and Health
3. Victorian Department of Health and Human Services
4. Institute of Race Relations
5. Multicultural Affairs and Social Cohesion
6. National Centre for Cultural Competence
7. VicHealth
8. Department of Social Services
9. Council of Australian Governments
10. InTouch Inc. Multicultural Centre against Family Violence
11. Migration Council of Australia
12. World Health Organization
13. International Organization for Migration
14. United Nations-Women
15. United Nations Fund for Population Activities
16. Australian National Research Organization for Women's Safety
17. Federation of Ethnic Communities Council (Australia)

| <b>Keywords for Grey Literature Website Searches</b>                                                                             |
|----------------------------------------------------------------------------------------------------------------------------------|
| Family violence/Domestic violence/Intimate Partner Violence/battered females/partner abuse/wife abuse/marital abuse/marital rape |
| Culture/cultural competency/cultural sensitivity/cultural intelligence/cultural safety                                           |
