# Supplementary material for: A Systematic Review of Culturally Competent Family Violence Responses to Women in Primary Care
Source: PubMed Central journal article supplement — Trauma Violence Abuse. 2021 Oct 10;24(2):928–45. doi: 10.1177/15248380211046968 (PMC10009494; doi:10.1177/15248380211046968), 2021-10-10
Supplement: sj-pdf-2-tva-10.1177_15248380211046968.pdf [file sj-pdf-2-tva-10.1177_15248380211046968.pdf]

# Cultural competency

## Codes

| Name                                                    | Description                                                  |
|---------------------------------------------------------|--------------------------------------------------------------|
| <b>ARTICLES</b>                                         |                                                              |
| Definition of cultural competency                       |                                                              |
| <b><i>Findings from care providers</i></b>              |                                                              |
| Barriers of care delivery to people of CALD backgrounds |                                                              |
| Communication                                           |                                                              |
| Cultural clues                                          |                                                              |
| Culturally specific signs                               |                                                              |
| Ethnic matching                                         |                                                              |
| Interpreter expectations                                |                                                              |
| Not cultural competency                                 |                                                              |
| Patient demographics that the clinic serves             | Explore the patient demographics that your clinic is serving |

| Name                                        | Description                                                                                                                                                                 |
|---------------------------------------------|-----------------------------------------------------------------------------------------------------------------------------------------------------------------------------|
| Patient expectations                        |                                                                                                                                                                             |
| Physician's response in countries of origin |                                                                                                                                                                             |
| The role of intuition                       |                                                                                                                                                                             |
| Training                                    |                                                                                                                                                                             |
| Understand where they are coming from       |                                                                                                                                                                             |
| <b><i>Findings from Women</i></b>           |                                                                                                                                                                             |
| Care expectations                           |                                                                                                                                                                             |
| <i>Care provider level</i>                  |                                                                                                                                                                             |
| Client preferences                          |                                                                                                                                                                             |
| Effort by the practitioners                 | Efforts by practitioners that don't directly relate to cultural competency but would make women of culturally and linguistically diverse backgrounds comfortable with them. |
| Ethnic match                                |                                                                                                                                                                             |
| Multiple interpretations of terms           |                                                                                                                                                                             |

| Name                                    | Description            |
|-----------------------------------------|------------------------|
| Culturally competent screening          |                        |
| Risk factors unique to women            |                        |
| What is not culturally competent        |                        |
| Cultural safety                         |                        |
| Safety planning                         |                        |
| Not cultural competency                 |                        |
| Risk factors unique to a group of women |                        |
| Safety planning                         |                        |
| <b>CONCEPTUAL PAPER</b>                 |                        |
| Advocacy-as a component of CC           | CC=Cultural competency |
| Current gap in services                 |                        |
| Definition of cultural sensitivity      |                        |
| Definition of Cultural skill            |                        |

| Name                                                    | Description                                                                            |
|---------------------------------------------------------|----------------------------------------------------------------------------------------|
| How care provider can deliver culturally competent care |                                                                                        |
| Language                                                |                                                                                        |
| Response model                                          |                                                                                        |
| Understand where they are coming from                   |                                                                                        |
| Meaning of cultural competency                          |                                                                                        |
| Operational level                                       |                                                                                        |
| How                                                     | How to deliver culturally competent care at the operational level                      |
| Women's expectations                                    |                                                                                        |
| <b>GREY LITERATURE FINDINGS</b>                         |                                                                                        |
| Communication that demonstrates cultural competence     |                                                                                        |
| How_communication                                       | How to communicate with women from diverse backgrounds?                                |
| Client preferences                                      | Approaches that allow clients with communication barriers to easily access the service |
| Practitioner level                                      |                                                                                        |

| Name                                  | Description                                                |
|---------------------------------------|------------------------------------------------------------|
| Recording                             |                                                            |
| Training                              |                                                            |
| Working with an interpreter           |                                                            |
| Cultural competence operational level |                                                            |
| How_operational level                 | How is cultural competence delivered at operational level? |
| Awareness of healthcare providers     |                                                            |
| Care delivery                         |                                                            |
| Intuitive practice                    |                                                            |
| Safety Planning and referral          |                                                            |
| Screening                             |                                                            |
| Infrastructure                        |                                                            |
| Practitioner's ethnicity              |                                                            |

| Name                                                               | Description |
|--------------------------------------------------------------------|-------------|
| Relationships and alliances                                        |             |
| Staff development                                                  |             |
| Understanding where the women is coming from                       |             |
| Use of interpreters                                                |             |
| Cultural competence_governance level                               |             |
| How is cultural competence delivered to people at governance level |             |
| organizational values                                              |             |
| Definition of cultural competence                                  |             |
| Definition of cultural sensitivity                                 |             |
| <b><i>Findings from women</i></b>                                  |             |
| Care expectations                                                  |             |
| What women say is not culturally competent                         |             |

| Name                                | Description                                          |
|-------------------------------------|------------------------------------------------------|
| <b><i>Indigenous population</i></b> | Studies and grey literature on indigenous population |
| Articles                            |                                                      |
| Care pathway                        |                                                      |
| Definition of cultural safety       |                                                      |
| Grey literature findings            |                                                      |
| Definition of cultural competency   |                                                      |
| Distinction between terms           |                                                      |
| cultural awareness                  |                                                      |
| cultural competence                 |                                                      |
| cultural proficiency                |                                                      |
| cultural respect                    |                                                      |
| cultural safety                     |                                                      |
| cultural sensitivity                |                                                      |
| Health care system level            |                                                      |

| Name                               | Description                                           |
|------------------------------------|-------------------------------------------------------|
| National level cultural competence |                                                       |
| Not cultural competency            |                                                       |
| Practitioner level                 |                                                       |
| How                                | How can practitioners interact with Indigenous women? |
